# Supplementary material
Source: ML conference proceedings conference paper supplement (https://openaccess.thecvf.com/content/CVPR_2019/html/Wei_Building_Detail-Sensitive_Semantic_CVPR_2019_paper.html)
Supplement: Supplementary file 1 [file Wei_Building_Detail-Sensitive_Semantic_CVPR_2019_supplemental.pdf]

# Building Detail-Sensitive Semantic Segmentation Networks with Polynomial Pooling

Supplementary File

Zhen Wei, Jingyi Zhang, Li Liu, Fan Zhu, Fumin Shen, Yi Zhou, Si Liu  
Yao Sun, Ling Shao

## 1. Proofs for the Propositions in Section 3.3

**Proposition 1:** *The  $p$  pooling is equivalent to average pooling when  $\alpha = 0$ .*

*Proof.* In the forward process, denote  $N$  to be the number of total elements in a pooling region and we have

$$y_j = \frac{\sum_{x_i \in R_j} x_i^{\alpha+1}}{\sum_{x_i \in R_j} x_i^\alpha} = \frac{\sum_{x_i \in R_j} x_i^1}{\sum_{x_i \in R_j} x_i^0} = \frac{1}{N} \sum_{x_i \in R_j} x_i .$$

While in the backward process, considering the gradient flow in one pooling region, namely to disentangle the summation over index  $j$ , then

$$\frac{\partial E}{\partial x_i} = \frac{(\alpha + 1)x_i^\alpha \sum_{x_i \in R_j} x_i^\alpha - \alpha x_i^{\alpha-1} \sum_{x_i \in R_j} x_i^{\alpha+1}}{(\sum_{x_i \in R_j} x_i^\alpha)^2} \delta_j^{l+1} = \frac{x_i^0 \sum_{x_i \in R_j} x_i^0}{(\sum_{x_i \in R_j} x_i^0)^2} \delta_j^{l+1} = \frac{N}{N^2} \delta_j^{l+1} = \frac{1}{N} \delta_j^{l+1} . \square$$

**Proposition 2:** *The  $p$  pooling performs as max pooling when  $\alpha \rightarrow +\infty$ .*

*Proof.* In  $j$ -th pooling region, given the greatest element  $x_{max}$  and the other elements  $x_k \in R_j - \{x_{max}\}$ , then in the forward process we have,

$$\lim_{\alpha \rightarrow +\infty} y_j = \frac{\sum_{x_i \in R_j} x_i^{\alpha+1}}{\sum_{x_i \in R_j} x_i^\alpha} = \frac{x_{max}^{\alpha+1}}{x_{max}^\alpha} = x_{max} ,$$

In the backward process, for each element,

$$\lim_{\alpha \rightarrow +\infty} \frac{\partial E}{\partial x_i} = \frac{(\alpha + 1)x_i^\alpha \sum_{x_i \in R_j} x_i^\alpha - \alpha x_i^{\alpha-1} \sum_{x_i \in R_j} x_i^{\alpha+1}}{(\sum_{x_i \in R_j} x_i^\alpha)^2} \delta_j^{l+1} = \frac{(\alpha + 1)x_i^\alpha x_{max}^\alpha - \alpha x_i^{\alpha-1} x_{max}^{\alpha+1}}{x_{max}^{2\alpha}} \delta_j^{l+1} ,$$

If  $x_i = x_{max}$ , then

$$\lim_{\alpha \rightarrow +\infty} \frac{\partial E}{\partial x_{max}} = \frac{(\alpha + 1)x_{max}^{2\alpha} - \alpha x_{max}^{2\alpha}}{x_{max}^{2\alpha}} \delta_j^{l+1} = \delta_j^{l+1} ,$$

Otherwise,

$$\begin{aligned} \lim_{\alpha \rightarrow +\infty} \frac{\partial E}{\partial x_k} &= \frac{(\alpha + 1)x_k^\alpha - \alpha x_k^{\alpha-1} x_{max}}{x_{max}^\alpha} \delta_j^{l+1} < \frac{(\alpha + 1)x_k^\alpha - \alpha x_k^\alpha}{x_{max}^\alpha} \delta_j^{l+1} = \left(\frac{x_k}{x_{max}}\right)^\alpha \delta_j^{l+1} = 0 , \\ \lim_{\alpha \rightarrow +\infty} \frac{(\alpha + 1)x_k^\alpha - \alpha x_k^{\alpha-1} x_{max}}{x_{max}^\alpha} \delta_j^{l+1} &> \frac{(\alpha + 1)x_k^{\alpha-1} - \alpha x_k^{\alpha-1} x_{max}}{x_{max}^\alpha} \delta_j^{l+1} = \left(\frac{x_k}{x_{max}}\right)^{\alpha-1} \left(\frac{\alpha + 1 - x_{max}}{x_{max}}\right) \delta_j^{l+1} \\ &= \left(\frac{x_k}{x_{max}}\right)^{\alpha-1} \left(\frac{\alpha}{x_{max}}\right) \delta_j^{l+1} , \end{aligned}$$

By using L'Hospital's rule, we have

$$\lim_{\alpha \rightarrow +\infty} \left(\frac{x_k}{x_{max}}\right)^{\alpha-1} \left(\frac{\alpha}{x_{max}}\right) \delta_j^{l+1} = \left(\frac{\alpha}{x_{max}}\right) \delta_j^{l+1} / \left(\frac{x_k}{x_{max}}\right)^{1-\alpha} = \left(\frac{1}{x_{max}}\right) \delta_j^{l+1} / \left(\frac{x_k}{(1-\alpha)x_{max}}\right)^{-\alpha} = 0 .$$

As  $0 < \partial E / \partial x_k < 0$ , so  $\partial E / \partial x_k = 0$ .  $\square$

## 2. Details of the Backward Process of $L_p$ Norm Pooling

As we claimed in Section 3.6, the backward process of  $L_p$  norm pooling is problematic. The reasons are two folds. First, the gradients respect to input data is not equal to the gradient in average ( $p = 1$ ) or max pooling ( $p \rightarrow +\infty$ ). Second, the gradient will explode when  $p = 0, 1$  or  $p \rightarrow +\infty$ , making end-to-end optimization difficult. Here we provide our mathematical evidences for these claims.

Given the notations defined in Section 3.1, the forward process of  $L_p$  norm is

$$f_{L_p}(R_j) = \left( \sum_{x_i \in R_j} x_i^p \right)^{1/p} . \quad (1)$$

Then the gradients for input data and  $p$  are

$$\frac{\partial E}{\partial x_i} = \sum_j \frac{\partial E}{\partial y_j} \frac{\partial y_j}{\partial x_i} = \sum_j x_i^{p-1} \left( \sum_{x_i \in R_j} x_i^p \right)^{\frac{p}{1-p}} \delta_j^{l+1} , \quad \frac{\partial E}{\partial p} = \left( -\frac{1}{p^2} \ln \left( \sum_{x_i \in R_j} x_i^p \right) + \frac{x_i^{p-1}}{\sum_{x_i \in R_j} x_i^p} \right) \left( \sum_{x_i \in R_j} x_i^p \right)^{\frac{1}{p}} \delta_j^{l+1} . \quad (2)$$

It can be easily observed that: (a) numerical issues will occur in  $\partial E / \partial p$  when  $p = 0$  and the result will explode when  $p \rightarrow +\infty$ ; (b) numerical issues will occur in  $\partial E / \partial x_i$  when  $p = 1$  and the result will explode when  $p \rightarrow +\infty$ . Therefore, the inequality of  $\partial E / \partial x_i$  between  $L_p$  norm and average/max poolings is corroborated because  $\partial E / \partial x_i$  cannot be calculated in the boundary conditions of  $L_p$  norm.

## 3. Full Quantitative Results of the Comparison on VOC Dataset in Table 1

In Section 4.1, we provide quantitative results of baseline models and our models in terms of their overall performances on VOC dataset. Here we demonstrate detailed results at category level.

| Method                                 | bg          | plane       | bike        | bird        | boat        | bottle      | bus         | car         | cat         | chair       | cow         | table       | dog         | horse       | mbike       | person      | plant       | sheep       | sofa        | train       | tv          | mean        |
|----------------------------------------|-------------|-------------|-------------|-------------|-------------|-------------|-------------|-------------|-------------|-------------|-------------|-------------|-------------|-------------|-------------|-------------|-------------|-------------|-------------|-------------|-------------|-------------|
| Max                                    | 87.7        | 59.7        | 25.0        | 62.6        | 49.1        | 55.2        | 70.5        | <b>66.1</b> | 68.7        | 21.3        | 51.6        | 40.6        | 60.5        | 48.4        | 57.3        | 70.6        | 33.6        | 53.6        | 36.7        | 62.9        | 48.2        | 53.8        |
| Average                                | 85.9        | 57.7        | 24.3        | 61.9        | 47.6        | 54.1        | 66.0        | 64.7        | 67.3        | 20.5        | 50.5        | 39.9        | 60.0        | 47.6        | 56.5        | 69.8        | 32.6        | 51.5        | 35.3        | 61.4        | 46.9        | 52.5        |
| Strided-C                              | 86.1        | 54.0        | 19.9        | 59.2        | 45.7        | 53.9        | 60.2        | 63.8        | 65.5        | 20.1        | 49.2        | 39.7        | 58.7        | 46.8        | 56.0        | 67.1        | 31.5        | 52.1        | 34.9        | 61.0        | 44.4        | 50.9        |
| Gated                                  | 86.8        | 58.9        | 24.8        | 62.1        | 48.2        | 54.8        | 67.1        | 64.9        | 67.5        | 20.7        | 51.4        | 40.8        | 59.8        | 47.9        | 57.7        | 69.7        | 34.2        | 52.8        | 36.1        | 62.5        | 47.4        | 53.1        |
| DPP                                    | 87.9        | 60.2        | 26.3        | 63.3        | 48.9        | 55.0        | 70.9        | 65.7        | 67.9        | 21.9        | 51.9        | 41.0        | 60.7        | 47.5        | 58.7        | 70.8        | 33.9        | 53.4        | 35.9        | 63.5        | 48.6        | 54.0        |
| $\mathcal{P}$ -pooling<br>(our method) | <b>88.3</b> | <b>60.8</b> | <b>28.8</b> | <b>63.9</b> | <b>49.9</b> | <b>55.7</b> | <b>71.1</b> | 66.0        | <b>69.2</b> | <b>25.2</b> | <b>52.8</b> | <b>43.1</b> | <b>61.1</b> | <b>48.9</b> | <b>60.3</b> | <b>71.4</b> | <b>36.1</b> | <b>54.8</b> | <b>37.5</b> | <b>64.0</b> | <b>49.1</b> | <b>55.1</b> |

Table 1. Quantitative comparisons of VGG-based baseline models and the model w/  $\mathcal{P}$ -pooling w.r.t. mIoU on the validation set of PASCAL VOC 2012.

| Method                                 | bg          | plane       | bike        | bird        | boat        | bottle      | bus         | car         | cat         | chair       | cow         | table       | dog         | horse       | mbike       | person      | plant       | sheep       | sofa        | train       | tv          | mean        |
|----------------------------------------|-------------|-------------|-------------|-------------|-------------|-------------|-------------|-------------|-------------|-------------|-------------|-------------|-------------|-------------|-------------|-------------|-------------|-------------|-------------|-------------|-------------|-------------|
| Max                                    | 89.9        | 71.7        | 30.1        | 69.1        | 55.7        | 62.8        | 77.7        | <b>72.4</b> | 75.1        | 25.0        | 55.1        | 32.7        | 66.5        | 56.3        | 66.8        | 74.6        | 46.3        | 62.2        | 37.1        | 70.7        | 65.5        | 60.2        |
| Average                                | 88.7        | 70.8        | 29.5        | 69.6        | 54.8        | 62.1        | 77.1        | 70.4        | 74.0        | 24.9        | 54.9        | 32.9        | 65.4        | 54.7        | 65.0        | 74.9        | 45.9        | 61.4        | 36.8        | 70.9        | 65.1        | 59.5        |
| Strided-C                              | 90.4        | 71.2        | 30.0        | 68.9        | 56.1        | 63.3        | 78.4        | 71.9        | 74.8        | 25.3        | 55.3        | 33.2        | 66.8        | 57.1        | 66.5        | 75.0        | 46.7        | 61.9        | 37.1        | 71.0        | 66.3        | 60.3        |
| Gated                                  | 89.6        | 71.0        | 30.4        | 67.9        | 55.5        | 62.5        | 77.4        | 71.2        | 73.4        | 24.6        | 54.8        | 32.9        | 65.0        | 55.4        | 65.9        | 74.1        | 45.2        | 61.5        | 36.5        | 69.4        | 64.8        | 59.5        |
| DPP                                    | 88.9        | 71.4        | 30.5        | 70.1        | 54.7        | 63.3        | 76.9        | 72.1        | 74.5        | 26.1        | 56.3        | 32.6        | 65.5        | 56.5        | 67.0        | 73.7        | 46.9        | 62.3        | 37.2        | 70.1        | 65.7        | 60.1        |
| $\mathcal{P}$ -pooling<br>(our method) | <b>90.5</b> | <b>72.1</b> | <b>32.3</b> | <b>70.8</b> | <b>56.5</b> | <b>64.1</b> | <b>78.6</b> | 72.3        | <b>75.9</b> | <b>26.7</b> | <b>58.0</b> | <b>34.5</b> | <b>67.0</b> | <b>57.3</b> | <b>68.1</b> | <b>75.3</b> | <b>48.9</b> | <b>62.7</b> | <b>38.3</b> | <b>71.8</b> | <b>66.6</b> | <b>61.3</b> |

Table 2. Quantitative comparisons of ResNet-based baseline models and the model w/  $\mathcal{P}$ -pooling w.r.t. mIoU on the validation set of PASCAL VOC 2012.

## 4. Segmentation Results

In this section, we provide additional comparisons on segmentation results on PASCAL VOC 2012, Cityscapes and ADE20K datasets, respectively. Models with  $\mathcal{P}$ -pooling are more sensitive to details, enabling the models to recover more small structures and suppress false positives near object boundaries.

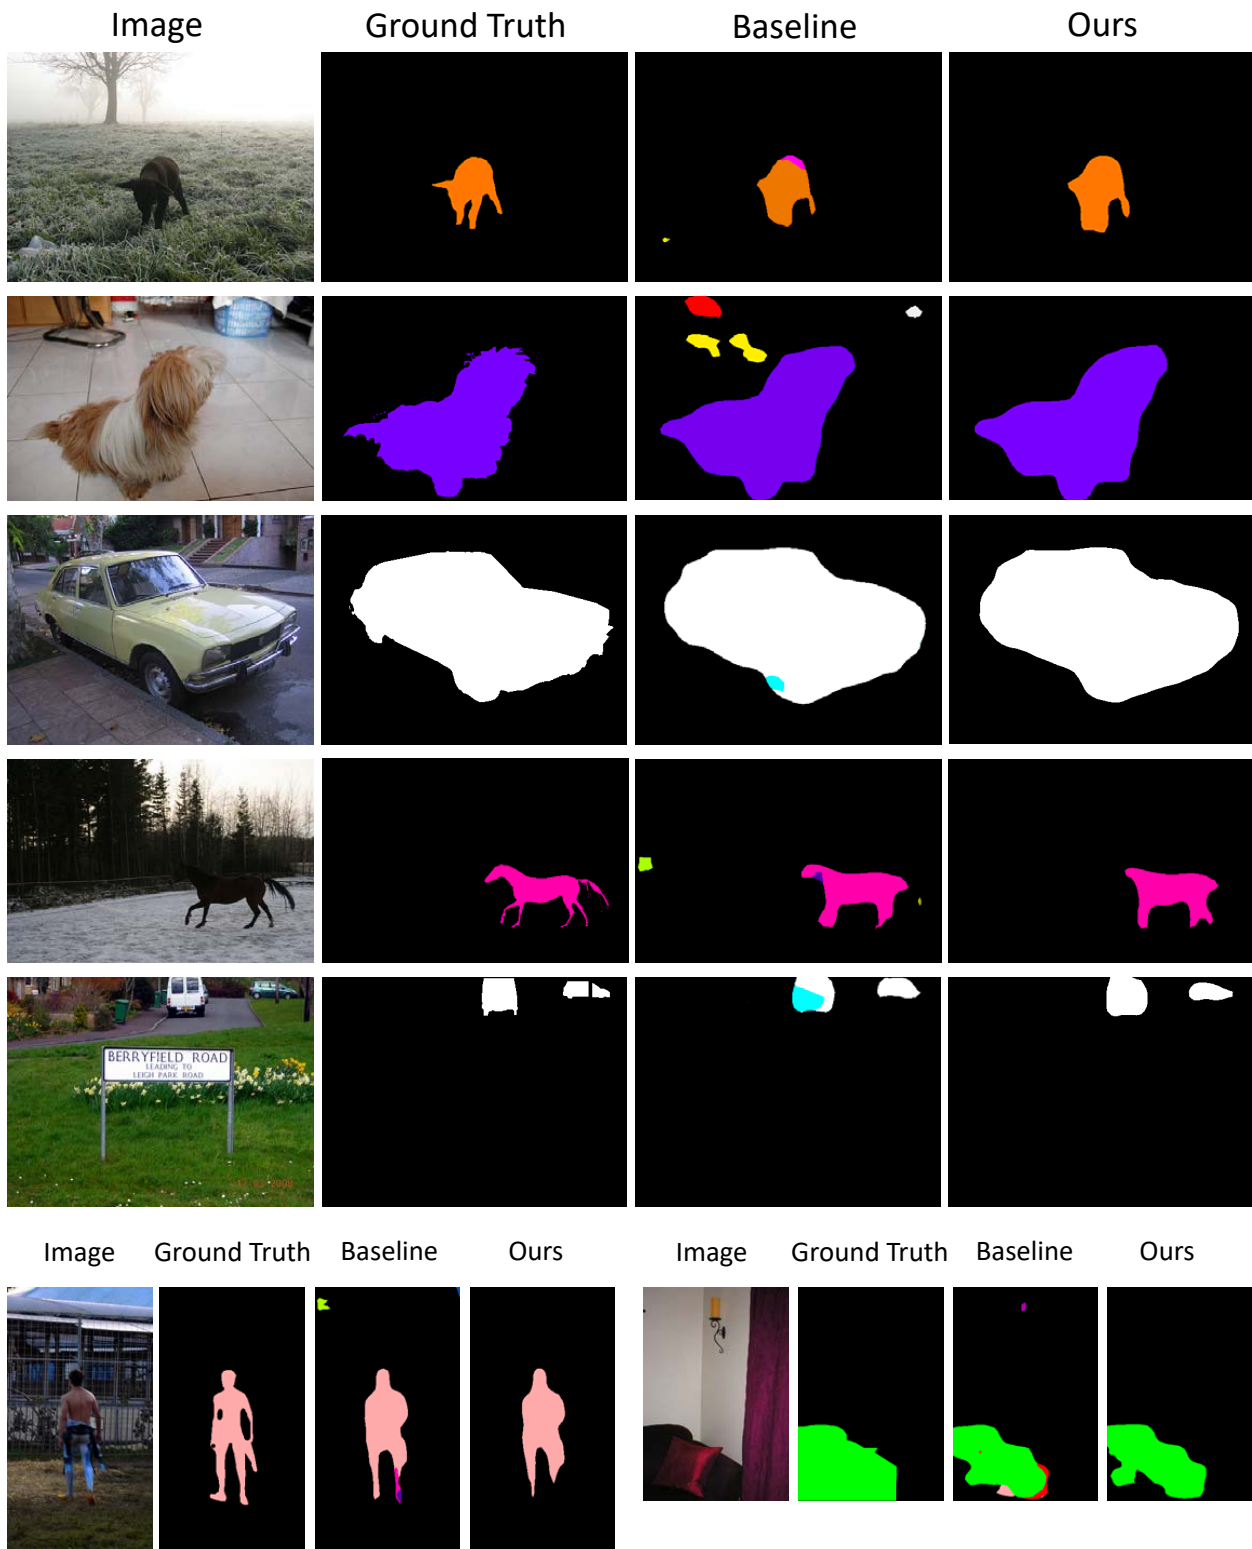

Figure 1. Comparisons on segmentation results of the VGG-based baseline model (w/ max pooling) and the proposed model (w/  $\mathcal{P}$ -pooling) on VOC dataset.

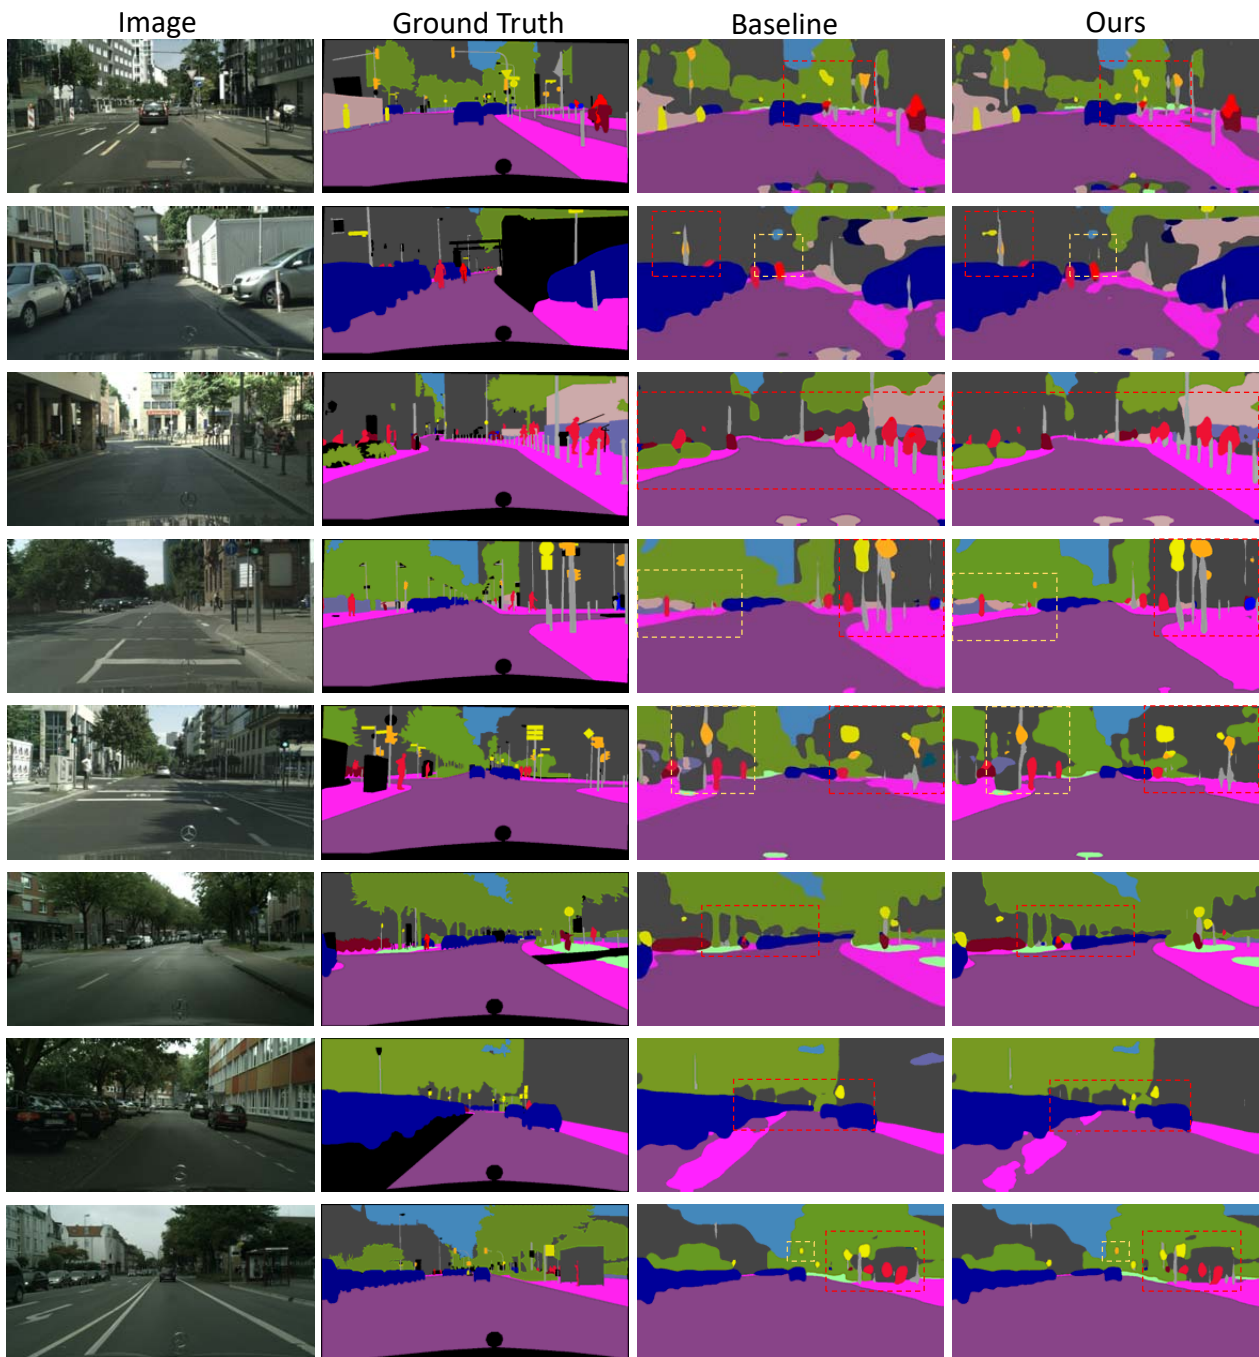

Figure 2. Comparisons on segmentation results of the Inceptionv2-based baseline model (w/ max pooling) and the proposed model (w/  $\mathcal{P}$ -pooling) on Cityscapes dataset.

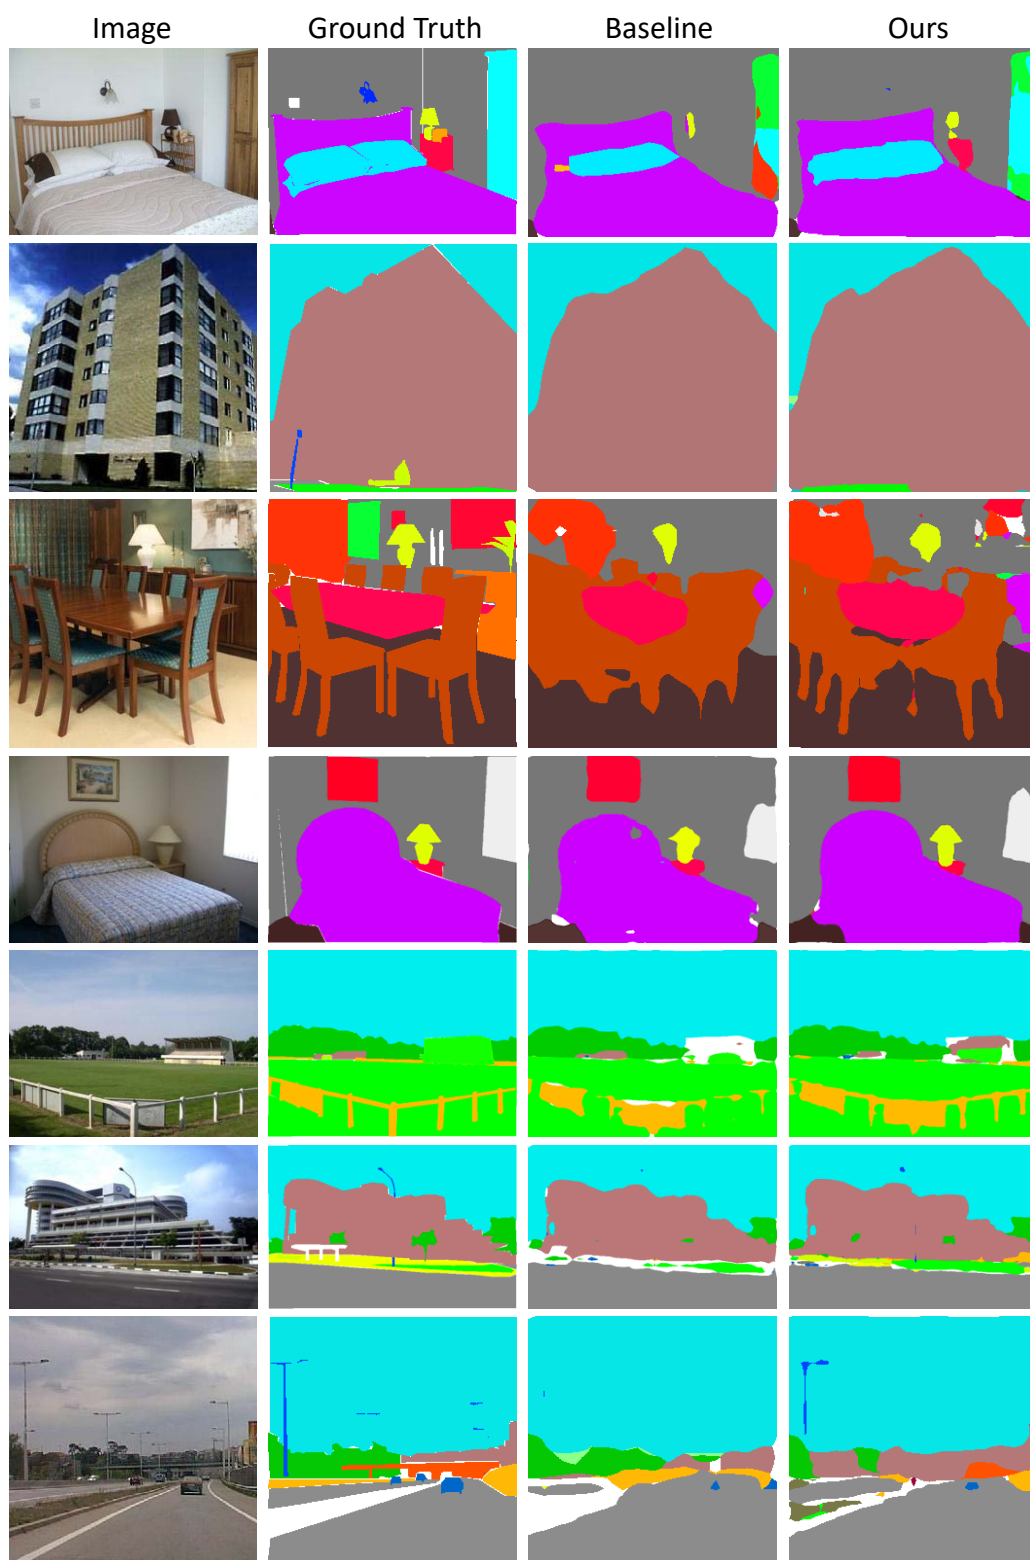

Figure 3. Comparisons on segmentation results of the Inceptionv2-based baseline model (w/ max pooling) and the proposed model (w/  $\mathcal{P}$ -pooling) on ADE20K dataset.
